# Supplementary material
Source: PubMed Central journal article supplement (PMC5370424)
Supplement: JB.00716-16_zjb008174357s1.pdf [file JB.00716-16_zjb008174357s1.pdf]

1           **Significance of a Post-translational Modification of the PilA Protein of *Geobacter***  
2           ***sulfurreducens* for Surface Attachment, Biofilm Formation and Growth on Insoluble**  
3           **Extracellular Electron Acceptors**

4

5   **Supporting Information**

6   Contains Figures S1 & S2.

7   **Lubna V. Richter<sup>a, c\*</sup>, Ashley E. Franks<sup>b, d</sup>, Robert M. Weis<sup>a†</sup> and Steven J. Sandler<sup>b</sup>**

8

9   <sup>a</sup> Department of Chemistry, 710 North Pleasant Street, University of Massachusetts at Amherst,  
10   Amherst, MA 01003, USA

11

12   <sup>b</sup> Department of Microbiology, Morrill Science Center IV N203, University of Massachusetts at  
13   Amherst, Amherst, MA 01003, USA

14

15   <sup>c</sup> Current affiliation: Department of Biological and Environmental Engineering, 111 Wing Drive,  
16   B49 Riley-Robb Hall, Cornell University, Ithaca, NY 14850, USA

17

18   <sup>d</sup> Current affiliation: Department of Physiology, Anatomy and Microbiology, Thomas Cherry  
19   Building, La Trobe University, Melbourne Victoria 3086, Australia

20

21   \*Correspondence:

22   E-mail. [la268@Cornell.edu](mailto:la268@Cornell.edu)

23   Tel. (607) 255- 6850

24   Fax. (607) 255- 4449

25

26   <sup>†</sup>Author is deceased

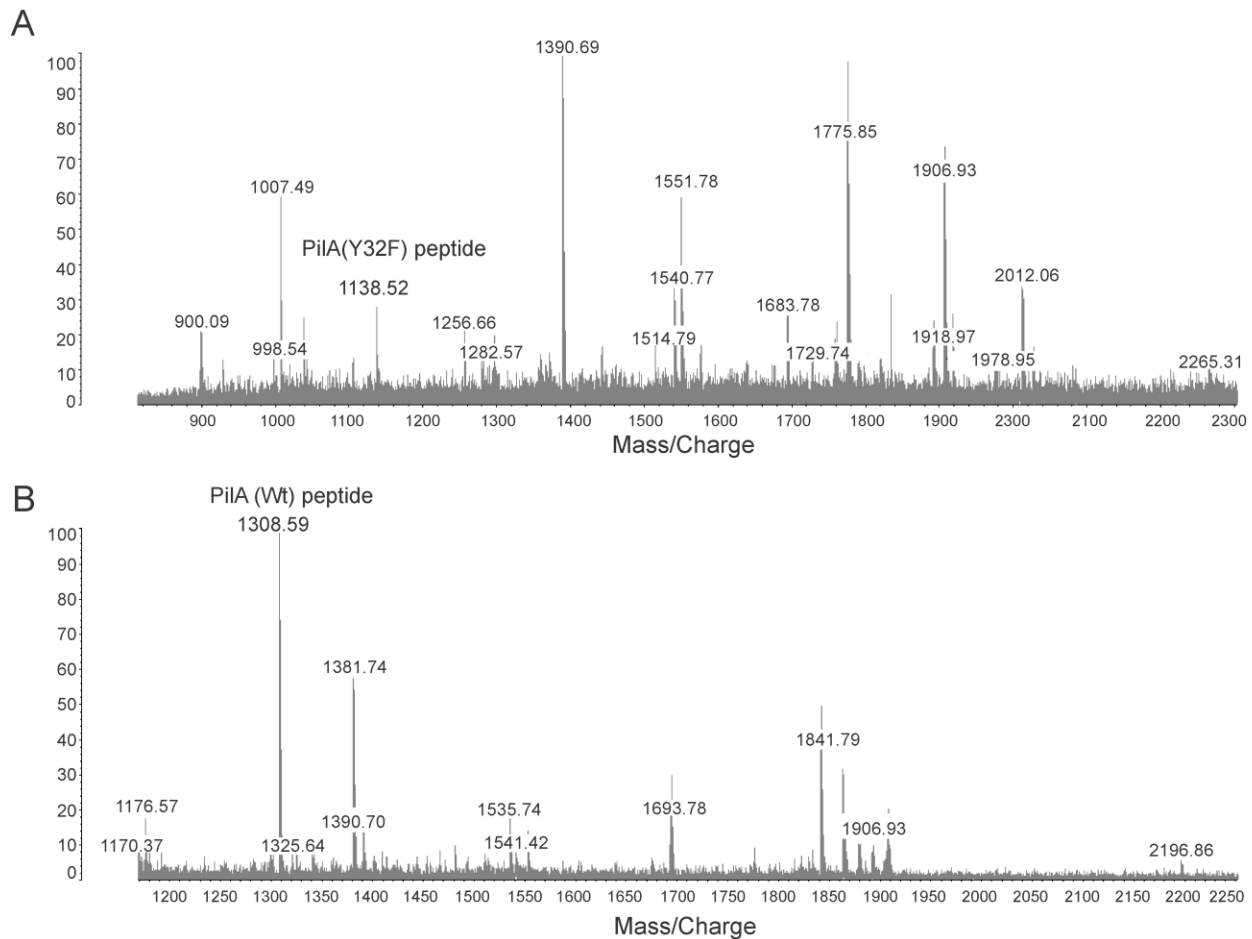

27

28

29 **FIG. S1. Comparison of Matrix-Associated Laser Desorption/Ionization (MALDI) mass**

30 **spectrometric data observed after tryptic digest of the secreted PilA(Y32F) and PilA(Wt)**

31 **proteins.** The samples also contain tryptic peptides of other co-eluted proteins of 7 kDa size.

32 One peptide of PilA(Y32F) is observed at 1138 Da that is consistent with the molecular weight of

33 the (AFNSAASSDLR) peptide containing an unmodified phenylalanine-32 (Panel A); whereas

34 the corresponding peptide from the PilA(Wt) protein is observed at 1308 Da which is equivalent

35 to a combined mass of a 1154 Da for the (AYNSAASSDLR) peptide and a glycerophosphate

36 group (154 Da) (Panel B).

37

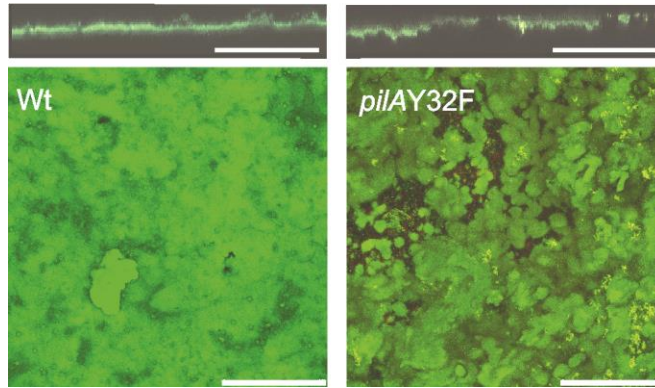

38

39

40 **FIG. S2. Confocal laser scanning micrographs of biofilms formed with the DL100 (Wt) and**

41 ***pilAY32F* mutant strains on graphite anodes in microbial fuel cells.** Cross-sectional (top) and

42 top-down (bottom) views are shown. Bacterial biofilms were imaged after producing maximum

43 current for 3 days (day 7 for Wt and day 19 for *pilAY32F*). The substratum surface coverage was

44 67% for the wild-type and 52% for the mutant. The maximum pillar heights were 55.00  $\mu\text{m}$  for

45 the wild-type and 50.00  $\mu\text{m}$  for the mutant. The deviation of height (roughness) across the

46 biofilm was  $0.26 \pm 0.1$  and  $0.27 \pm 0.1$  for the wild-type and mutant respectively; values are

47 averages of triplicate samples  $\pm$  the standard deviation. Scale bars, 250  $\mu\text{m}$ .

48
